# Supplementary material
Source: PubMed Central journal article supplement (PMC7015624)
Supplement: ehp-128-017004-s001.pdf [file ehp-128-017004-s001.pdf]

**Note to readers with disabilities:** *EHP* strives to ensure that all journal content is accessible to all readers. However, some figures and Supplemental Material published in *EHP* articles may not conform to [508 standards](#) due to the complexity of the information being presented. If you need assistance accessing journal content, please contact [ehp508@niehs.nih.gov](mailto:ehp508@niehs.nih.gov). Our staff will work with you to assess and meet your accessibility needs within 3 working days.

### **Supplemental Material**

#### **Leukocyte Traits and Exposure to Ambient Particulate Matter Air Pollution in the Women's Health Initiative and Atherosclerosis Risk in Communities Study**

Rahul Gondalia, Katelyn M. Holliday, Antoine Baldassari, Anne E. Justice, James D. Stewart, Duanping Liao, Jeff D. Yanosky, Stephanie M. Engel, Kristina M. Jordahl, Parveen Bhatti, Steve Horvath, Themistocles L. Assimes, James S. Pankow, Ellen W. Demerath, Weihua Guan, Myriam Fornage, Jan Bressler, Kari E. North, Karen N. Conneely, Yun Li, Lifang Hou, Andrea A. Baccarelli, and Eric A. Whitsel

#### **Table of Contents**

**Table S1.** Additional details for populations with estimated leukocyte composition data, Women's Health Initiative (1993-2002) and Atherosclerosis Risk in Communities study (1990-1995).

**Table S2.** Characteristics of n=8,457 participants with estimated leukocyte composition data before imputation, Women's Health Initiative (1993-2002) and Atherosclerosis Risk in Communities study (1990-1995).

**Table S3.** Mean (SD) particulate matter concentrations among n=8,457 with estimated leukocyte composition data before imputation, Women's Health Initiative (1993-2002) and Atherosclerosis Risk in Communities study (1990-1995).

**Table S4.** Pooled difference in leukocyte count ( $\Delta$ , cell/ $\mu$ L) per 10  $\mu$ g/m<sup>3</sup> increase in 28- and 365-day mean PM<sub>10</sub> concentrations among n=165,675 participants, Women's Health Initiative (1993-2002) and Atherosclerosis Risk in Communities study (1986-1998).

**Table S5.** Pooled difference in estimated leukocyte proportion ( $\Delta$ , %) per 10  $\mu$ g/m<sup>3</sup> increase in PM concentrations among n=8,457 participants, Women's Health Initiative (1993-2002) and Atherosclerosis Risk in Communities study (1990-1995).

**Table S6.** Pooled difference in estimated leukocyte proportion ( $\Delta$ , %) per 10  $\mu$ g/m<sup>3</sup> increase in PM concentrations among n=8,457 participants, Women's Health Initiative (1993-2002) and Atherosclerosis Risk in Communities study (1990-1995).

**Table S7.** Pooled difference in measured leukocyte proportion ( $\Delta$ , %) per  $10 \mu\text{g}/\text{m}^3$  increase in  $\text{PM}_{2.5}$  concentrations among  $n=8,646$  participants, Atherosclerosis Risk in Communities study (1986-1992).

**Table S8.** Pooled difference in CD4:CD8 ratio ( $\Delta$ , %) per  $10 \mu\text{g}/\text{m}^3$  increase in PM concentrations among  $n=8,457$  participants, Women's Health Initiative (1993-2002) and Atherosclerosis Risk in Communities study (1990-1995).

**Figure S1.** Diagram of Women's Health Initiative (1993-2002) and Atherosclerosis Risk in Communities study (1986-1998) populations and subpopulations with leukocyte composition data.

**Figure S2.** Study/center-specific and pooled differences in leukocyte count ( $\Delta$ , cell/ $\mu\text{L}$ ) per  $10 \mu\text{g}/\text{m}^3$  increase in 1- and 12-month mean concentrations of  $\text{PM}_{2.5}$  among  $n=165,675$  participants, Women's Health Initiative (1993-2002) and Atherosclerosis Risk in Communities study (1986-1998). The models adjusted for race/ethnicity, age, sex (in ARIC), randomly assigned treatment group (in WHI), mean temperature, mean dew point, mean barometric pressure, season, and a restricted cubic natural spline function of calendar date with one knot per year, individual-level education, neighborhood socioeconomic status, smoking status, alcohol use, body mass index, and physical activity.

**Figure S3.** Pooled difference in leukocyte count ( $\Delta$ , cell/ $\mu\text{L}$ ) per  $10 \mu\text{g}/\text{m}^3$  increase in PM among  $n=165,675$  participants, Women's Health Initiative (1993-2002) and Atherosclerosis Risk in Communities study (1986-1998). The models adjusted for race/ethnicity, age, sex (in ARIC), randomly assigned treatment group (in WHI), mean temperature, mean dew point, mean barometric pressure, season, individual-level education, neighborhood socioeconomic status, smoking status, alcohol use, body mass index, and physical activity (●), with additional adjustment for a restricted cubic natural spline function of calendar date with 1 knot for every 2 years (▼), 1 knot per year (■), and 2 knots per year (+).

**Figure S4.** Pooled difference in leukocyte composition ( $\Delta$ , % point) per  $10 \mu\text{g}/\text{m}^3$  increase in A) 2- and B) 7-day mean  $\text{PM}_{10}$ ; C) 1- and B) 12-month mean  $\text{PM}_{10}$ ; and E) 1- and F) 12-month mean  $\text{PM}_{2.5-10}$  concentrations among  $n=8,457$  participants, Women's Health Initiative (1993-2002) and Atherosclerosis Risk in Communities study (1990-1995). Model 1 adjusted for race/ethnicity, age, sex (in ARIC), randomly assigned treatment group (in WHI), mean temperature, mean dew point, mean barometric pressure, season, and subpopulation-specific covariates. Model 2 also adjusted for individual-level education and neighborhood socioeconomic status. Model 3 additionally adjusted for smoking status, alcohol use, body mass index, and physical activity.

**Table S1.** Additional details for populations with estimated leukocyte composition data, Women's Health Initiative (1993-2002) and Atherosclerosis Risk in Communities study (1990-1995)

| Study name              | Alternative name                                                                             | Abbreviation | Study PIs                                                          | Website                                                                                                                                                                                                                                                                                                                                                                       |
|-------------------------|----------------------------------------------------------------------------------------------|--------------|--------------------------------------------------------------------|-------------------------------------------------------------------------------------------------------------------------------------------------------------------------------------------------------------------------------------------------------------------------------------------------------------------------------------------------------------------------------|
| Ancillary Study 315     | Epigenetic Mechanisms of PM-Mediated Cardiovascular Disease                                  | EMPC         | Eric Whitsel<br>Andrea Baccarelli<br>Lifang Hou                    | <a href="https://projectreporter.nih.gov/project_info_description.cfm?aid=9054857&amp;icde=40216248&amp;ddparam=&amp;ddvalue=&amp;ddsueb=&amp;cr=1&amp;csb=default&amp;cs=ASC&amp;pball=">https://projectreporter.nih.gov/project_info_description.cfm?aid=9054857&amp;icde=40216248&amp;ddparam=&amp;ddvalue=&amp;ddsueb=&amp;cr=1&amp;csb=default&amp;cs=ASC&amp;pball=</a> |
| Broad Agency Award 23   | Integrative Genomics and Risk of CHD and Related Phenotypes in the Women's Health Initiative | BAA23        | Themistocles Assimes<br>Phil Tsao<br>Devin Absher<br>Steve Horvath | <a href="https://www.whi.org/researchers/data/WHIStudies/StudySites/BA23/pages/home.aspx">https://www.whi.org/researchers/data/WHIStudies/StudySites/BA23/pages/home.aspx</a>                                                                                                                                                                                                 |
| Ancillary Study 311     | Bladder Cancer and Leukocyte Methylation study                                               | AS311        | Parveen Bhatti                                                     | <a href="https://www.whi.org/researchers/data/WHIStudies/StudySites/AS311/Pages/home.aspx">https://www.whi.org/researchers/data/WHIStudies/StudySites/AS311/Pages/home.aspx</a>                                                                                                                                                                                               |
| ARIC-African Americans  | NA                                                                                           | ARIC-AA      | Eric Boerwinkle                                                    | NA                                                                                                                                                                                                                                                                                                                                                                            |
| ARIC-European Americans | NA                                                                                           | ARIC-EA      | Myriam Fornage<br>Eric Boerwinkle                                  | NA                                                                                                                                                                                                                                                                                                                                                                            |

**Table S2.** Characteristics of n=8,457 participants with estimated leukocyte composition data before imputation, Women's Health Initiative (1993-2002) and Atherosclerosis Risk in Communities study (1990-1995)

| Characteristic                                      | WHI & ARIC<br>n = 8,457 | WHI-EMPC<br>n = 2,160 | WHI-AS311<br>n = 822 | WHI-BAA23<br>n = 1,910 | ARIC-AA <sup>a</sup><br>n = 2,534 | ARIC-EA <sup>b</sup><br>n = 1,031 |
|-----------------------------------------------------|-------------------------|-----------------------|----------------------|------------------------|-----------------------------------|-----------------------------------|
| Male, n (%)                                         | 1,380 (16.3)            | 0 (0.0)               | 0 (0.0)              | 0 (0.0)                | 943 (37.2)                        | 437 (42.4)                        |
| Age (years), mean (SD)                              | 61.5 (7.4)              | 63.7 (7.0)            | 65.4 (7.1)           | 64.8 (7.1)             | 56.6 (5.9)                        | 59.9 (5.5)                        |
| Race / ethnicity, n (%)                             |                         |                       |                      |                        |                                   |                                   |
| American Indian or Alaskan Native                   | 51 ( 0.6)               | 50 (2.3)              | 1 (0.1)              | 0 (0.0)                | 0 (0.0)                           | 0 (0.0)                           |
| Asian or Pacific islander                           | 147 ( 1.7)              | 132 (6.1)             | 15 (1.8)             | 0 (0.0)                | 0.0 (0.0)                         | 0 (0.0)                           |
| Black or African American                           | 3,737 (44.2)            | 544 (25.2)            | 58 (7.1)             | 601 (31.5)             | 2534 (100.0)                      | 0 (0.0)                           |
| Hispanic/Latino                                     | 717 ( 8.5)              | 314 (14.5)            | 24 (2.9)             | 379 (19.8)             | -- <sup>c</sup>                   | -- <sup>c</sup>                   |
| Other                                               | 42 ( 0.5)               | 33 (1.5)              | 9 (1.1)              | 0 (0.0)                | 0 (0.0)                           | 0 (0.0)                           |
| White (not of Hispanic origin) or European American | 3763 (44.5)             | 1,087 (50.3)          | 715 (86.9)           | 930 (48.7)             | 0 (0.0)                           | 1,031 (100.0)                     |
| Education, n (%)                                    |                         |                       |                      |                        |                                   |                                   |
| High school education or lower                      | 4,030 (47.9)            | 591 (28.6)            | 177 (21.7)           | 609 (32.2)             | 1,562 (61.8)                      | 479 (46.5)                        |
| More than high school                               | 4,378 (52.1)            | 1,551 (71.4)          | 640 (78.3)           | 1,283 (67.8)           | 964 (38.2)                        | 552 (53.5)                        |
| Smoking status, n (%)                               |                         |                       |                      |                        |                                   |                                   |
| Never                                               | 4,044 (48.5)            | 1,126 (53.3)          | 367 (45.5)           | 1,007 (53.6)           | 1,113 (44.9)                      | 431 (41.8)                        |
| Former                                              | 3,042 (36.5)            | 828 (39.2)            | 371 (46.0)           | 685 (36.4)             | 756 (30.1)                        | 402 (39.0)                        |
| Current                                             | 1,255 (15.0)            | 158 (7.5)             | 69 (8.6)             | 188 (10.0)             | 642 (25.6)                        | 198 (19.2)                        |
| Alcohol use, n (%)                                  |                         |                       |                      |                        |                                   |                                   |
| Never                                               | 1,883 (22.4)            | 289 (13.6)            | 90 (11.0)            | 307 (16.1)             | 876 (34.9)                        | 321 (31.1)                        |
| Former                                              | 2,156 (25.7)            | 610 (28.7)            | 155 (18.9)           | 450 (23.6)             | 795 (31.6)                        | 146 (14.2)                        |
| Current                                             | 4,351 (51.9)            | 1,225 (57.7)          | 575 (70.1)           | 1,146 (60.2)           | 841 (33.5)                        | 564 (54.7)                        |
| Body mass index (kg/m <sup>2</sup> ), mean (SD)     | 29.2 (6.1)              | 29.5 (5.9)            | 28.0 (6.2)           | 29.9 (6.1)             | 30.1 (6.3)                        | 26.2 (4.4)                        |
| Physical activity (MET-hours/week), mean (SD)       | 12.3 (12.9)             | 10.3 (12.5)           | 11.6 (12.6)          | 10.0 (12.6)            | 12.8 (11.3)                       | 20.6 (14.2)                       |
| Neighborhood SES (z-score sum)                      | -2.4 (5.9)              | -1.6 (5.7)            | 0.2 (5.2)            | -2.6 (5.8)             | -5.9 (4.3)                        | 2.8 (4.8)                         |
| Leukocyte count (cell/uL), mean (SD)                | 5,846 (1,607)           | 5,864 (1,507)         | 5,924 (1,481)        | 6,074 (1,610)          | 5,609 (1,675)                     | 5,972 (1,611)                     |
| CD8+ T cells (%)                                    | 9 (6)                   | 10 (7)                | 9 (4)                | 5 (5)                  | 12 (5)                            | 10 (4)                            |
| CD4 +T cells (%)                                    | 18 (7)                  | 20 (7)                | 17 (7)               | 21 (7)                 | 16 (7)                            | 16 (6)                            |
| Nature killer cells (%)                             | 7 (5)                   | 2 (2)                 | 9 (5)                | 9 (5)                  | 7 (5)                             | 7 (4)                             |
| B cells (%)                                         | 7 (4)                   | 5 (4)                 | 6 (3)                | 9 (4)                  | 8 (3)                             | 6 (3)                             |
| Monocytes (%)                                       | 10 (3)                  | 12 (3)                | 11 (3)               | 8 (3)                  | 9 (3)                             | 8 (3)                             |
| Granulocytes (%)                                    | 49 (12)                 | 50 (12)               | 49 (12)              | 48 (12)                | 48 (13)                           | 54 (12)                           |

<sup>a</sup>Participants were from Jackson (90%) or Forsyth County (10%)

<sup>b</sup>Participants were from Forsyth County (90%), Minneapolis (8%) or Washington County (2%)

<sup>c</sup>ARIC recruitment and data collection occurred before the National Institute of Health required collection of information about Hispanic/Latino ethnicity

**Table S3.** Mean (SD) particulate matter concentrations among n=8,457 with estimated leukocyte composition data before imputation, Women's Health Initiative (1993-2002) and Atherosclerosis Risk in Communities study (1990-1995)

| PM ( $\mu\text{g}/\text{m}^3$ ) | WHI & ARIC<br>n = 8,457 | WHI-EMPC<br>n = 2,160 | WHI-AS311<br>n = 822 | WHI-BAA23<br>n = 1,910 | ARIC-AA <sup>a</sup><br>n = 2,534 | ARIC-EA <sup>b</sup><br>n = 1,031 |
|---------------------------------|-------------------------|-----------------------|----------------------|------------------------|-----------------------------------|-----------------------------------|
| PM <sub>10</sub>                |                         |                       |                      |                        |                                   |                                   |
| 2-day                           | 31.7 (12.1)             | 28.5 (11.1)           | 28.2 (10.8)          | 28.4 (10.9)            | 36.1 (12.4)                       | 35.9 (11.5)                       |
| 7-day                           | 30.8 (9.3)              | 27.6 (7.9)            | 27.2 (8.2)           | 27.8 (8.3)             | 35.2 (9.3)                        | 34.9 (8.2)                        |
| 1-month                         | 21.90 (5.9)             | 20.8 (6.6)            | 20.1 (6.1)           | 20.9 (6.5)             | 20.5 (4.6)                        | 23.1 (5.2)                        |
| 12-month                        | 21.0 (4.2)              | 21.1 (5.3)            | 20.4 (4.8)           | 21.1 (4.8)             | 19.9 (1.7)                        | 23.7 (2.4)                        |
| PM <sub>2.5</sub>               |                         |                       |                      |                        |                                   |                                   |
| 1-month                         | 13.3 (4.5)              | 13.8 (5.7)            | 12.1 (3.9)           | 12.2 (4.1)             | 13.1 (3.1)                        | 15.4 (4.3)                        |
| 12-month                        | 13.2 (3.2)              | 13.8 (4.4)            | 12.1 (2.8)           | 12.2 (2.9)             | 12.7 (1.3)                        | 15.9 (2.1)                        |
| PM <sub>2.5-10</sub>            |                         |                       |                      |                        |                                   |                                   |
| 1-month                         | 7.7 (4.0)               | 7.0 (5.2)             | 8.0 (4.3)            | 8.8 (4.8)              | 7.3 (2.1)                         | 7.7 (2.5)                         |
| 12-month                        | 7.8 (3.2)               | 7.3 (4.2)             | 8.3 (3.8)            | 8.9 (4.0)              | 7.2 (0.8)                         | 7.8 (1.4)                         |

Abbreviations: AA, African Americans; ARIC, Atherosclerosis Risk in Communities; AS311, Ancillary Study 311; BAA23, Broad Agency Award 23; CI, confidence intervals; EA, European Americans; EMPC, Epigenetic Mechanisms of Particulate Matter-Mediated Cardiovascular Disease; PM, particulate matter; PM<sub>10</sub>, PM < 10  $\mu\text{m}$  in diameter; PM<sub>2.5</sub>, PM < 2.5  $\mu\text{m}$  in diameter; PM<sub>2.5-10</sub>, PM > 2.5 and < 10  $\mu\text{m}$  in diameter; SD, standard deviation; WHI, Women's Health Initiative

<sup>a</sup>Participants were from Jackson (90%) or Forsyth County (10%)

<sup>b</sup>Participants were from Forsyth County (90%), Minneapolis (8%) or Washington County (2%)

**Table S4.** Pooled difference in leukocyte count ( $\Delta$ , cell/ $\mu\text{L}$ ) per 10  $\mu\text{g}/\text{m}^3$  increase in 28- and 365-day mean  $\text{PM}_{10}$  concentrations among  $n=165,675$  participants, Women's Health Initiative (1993-2002) and Atherosclerosis Risk in Communities study (1986-1998)

|                                               | Model 1 <sup>a</sup>                     |                             | Model 2 <sup>b</sup>                     |                             | Model 3 <sup>c</sup>                     |                             |
|-----------------------------------------------|------------------------------------------|-----------------------------|------------------------------------------|-----------------------------|------------------------------------------|-----------------------------|
|                                               | $\Delta$ (95% CI)<br>cell/ $\mu\text{L}$ | $P_{\text{Cochran's } Q^d}$ | $\Delta$ (95% CI)<br>cell/ $\mu\text{L}$ | $P_{\text{Cochran's } Q^d}$ | $\Delta$ (95% CI)<br>cell/ $\mu\text{L}$ | $P_{\text{Cochran's } Q^d}$ |
| $\text{PM}_{10}$ ( $\mu\text{g}/\text{m}^3$ ) |                                          |                             |                                          |                             |                                          |                             |
| 28-day mean                                   | -7 (-23, 9)                              | 0.38                        | -8 (-25, 8)                              | 0.37                        | -11 (-26, 5)                             | 0.41                        |
| 365-day mean                                  | -32 (-95, 30)                            | 0.95                        | -38 (-101, 24)                           | 0.98                        | -26 (-84, 34)                            | 0.99                        |

Abbreviations: ARIC, Atherosclerosis Risk in Communities; CI, confidence intervals; PM, particulate matter;  $\text{PM}_{10}$ ,  $\text{PM} < 10 \mu\text{m}$  in diameter; WHI, Women's Health Initiative

<sup>a</sup>Model 1 adjusted for race/ethnicity, age, gender (in ARIC), randomly assigned treatment group (in WHI), mean temperature, mean dew point, mean barometric pressure, season, and a restricted cubic natural spline function of calendar time with one knot per calendar year

<sup>b</sup>Model 2 adjusted for all covariates in Model 1 and additionally for individual-level education and neighborhood socioeconomic status

<sup>c</sup>Model 3 adjusted for all covariates in Model 2 and additionally for smoking status, alcohol use, body mass index, and physical activity

<sup>d</sup>Homogeneity of associations among strata was tested using Cochran's Q test statistic, where a  $P_{\text{Cochran's } Q} < 0.10$  suggests there is evidence to reject the null hypothesis of homogeneity

**Table S5.** Pooled difference in estimated leukocyte proportion ( $\Delta$ , %) per 10  $\mu\text{g}/\text{m}^3$  increase in PM concentrations among n=8,457 participants, Women's Health Initiative (1993-2002) and Atherosclerosis Risk in Communities study (1990-1995)

|                                                                  | CD8+ T cells                        |                             | CD4+ T cells                        |                             | Natural Killer cells                |                             | B cells                             |                             | Monocytes                           |                             | Granulocytes                        |                             |
|------------------------------------------------------------------|-------------------------------------|-----------------------------|-------------------------------------|-----------------------------|-------------------------------------|-----------------------------|-------------------------------------|-----------------------------|-------------------------------------|-----------------------------|-------------------------------------|-----------------------------|
|                                                                  | $\Delta$ %<br>(95% CI) <sup>a</sup> | $P_{\text{Cochran's } Q^b}$ | $\Delta$ %<br>(95% CI) <sup>a</sup> | $P_{\text{Cochran's } Q^b}$ | $\Delta$ %<br>(95% CI) <sup>a</sup> | $P_{\text{Cochran's } Q^b}$ | $\Delta$ %<br>(95% CI) <sup>a</sup> | $P_{\text{Cochran's } Q^d}$ | $\Delta$ %<br>(95% CI) <sup>a</sup> | $P_{\text{Cochran's } Q^b}$ | $\Delta$ %<br>(95% CI) <sup>a</sup> | $P_{\text{Cochran's } Q^b}$ |
| <b>PM<sub>10</sub> (<math>\mu\text{g}/\text{m}^3</math>)</b>     |                                     |                             |                                     |                             |                                     |                             |                                     |                             |                                     |                             |                                     |                             |
| 2-day mean                                                       | 0.1<br>(-0.4, 0.6)                  | 0.14                        | -0.1<br>(-0.4, 0.3)                 | 0.04                        | 0.0<br>(-0.3, 0.3)                  | 0.97                        | -0.2<br>(-0.4, 0.0)                 | 0.36                        | 0.0<br>(-0.1, 0.2)                  | 0.56                        | 0.1<br>(-0.2, 0.3)                  | 0.64                        |
| 7-day mean                                                       | 0.3<br>(-0.2, 0.8)                  | 0.36                        | -0.2<br>(-0.5, 0.1)                 | 0.39                        | -0.1<br>(-0.5, 0.3)                 | 0.33                        | -0.4<br>(-0.7, -0.1)                | 0.85                        | -0.1<br>(-0.3, 0.2)                 | 0.55                        | -0.2<br>(-0.5, 0.1)                 | 0.37                        |
| 1-month mean                                                     | -0.4<br>(-1.2, 0.4)                 | 0.22                        | -0.1<br>(-0.6, 0.5)                 | 0.19                        | -0.3<br>(-0.9, 0.4)                 | 0.23                        | -0.2<br>(-0.6, 0.3)                 | 0.62                        | 0.2<br>(-0.4, 0.7)                  | 0.07                        | 0.4<br>(-0.1, 0.8)                  | 0.34                        |
| 12-month mean                                                    | -0.3<br>(-1.2, 0.5)                 | 0.75                        | 0.0<br>(-0.5, 0.6)                  | 0.45                        | -0.4<br>(-1.5, 0.8)                 | 0.11                        | -0.3<br>(-1.0, 0.3)                 | 0.61                        | -0.3<br>(-0.7, 0.1)                 | 0.43                        | -0.1<br>(-0.9, 0.8)                 | 0.16                        |
| <b>PM<sub>2.5</sub> (<math>\mu\text{g}/\text{m}^3</math>)</b>    |                                     |                             |                                     |                             |                                     |                             |                                     |                             |                                     |                             |                                     |                             |
| 1-month mean                                                     | -1.1<br>(-1.8, -0.3)                | 0.55                        | -0.3<br>(-1.1, 0.6)                 | 0.15                        | -0.5<br>(-2.0, 1.1)                 | 0.00                        | -0.5<br>(-1.1, 0.1)                 | 0.71                        | -0.1<br>(-0.5, 0.3)                 | 0.40                        | 1.2<br>(0.6, 1.7)                   | 0.81                        |
| 12-month mean                                                    | -1.2<br>(-2.3, -0.1)                | 0.84                        | 0.3<br>(-0.5, 1.1)                  | 0.39                        | -1.5<br>(-3.8, 0.8)                 | 0.02                        | -0.8<br>(-1.8, 0.2)                 | 0.42                        | -0.4<br>(-0.9, 0.1)                 | 0.66                        | 1.0<br>(-0.3, 2.3)                  | 0.25                        |
| <b>PM<sub>2.5-10</sub> (<math>\mu\text{g}/\text{m}^3</math>)</b> |                                     |                             |                                     |                             |                                     |                             |                                     |                             |                                     |                             |                                     |                             |
| 1-month mean                                                     | 0.5<br>(-1.0, 1.9)                  | 0.16                        | 0.0<br>(-0.6, 0.5)                  | 0.59                        | -0.1<br>(-0.9, 0.7)                 | 0.93                        | -0.1<br>(-0.8, 0.6)                 | 0.83                        | 0.1<br>(-0.7, 0.8)                  | 0.16                        | -0.6<br>(-1.2, 0.0)                 | 0.40                        |
| 12-month mean                                                    | 0.3<br>(-1.6, 2.3)                  | 0.21                        | -0.2<br>(-1.1, 0.7)                 | 0.34                        | 0.1<br>(-1.0, 1.2)                  | 0.79                        | -0.1<br>(-1.1, 0.9)                 | 0.64                        | -0.2<br>(-0.9, 0.4)                 | 0.62                        | -1.2<br>(-2.3, 0.0)                 | 0.19                        |

Abbreviations: ARIC, Atherosclerosis Risk in Communities; CI, confidence intervals; PM, particulate matter; PM<sub>10</sub>, PM < 10  $\mu\text{m}$  in diameter; PM<sub>2.5</sub>, PM < 2.5  $\mu\text{m}$  in diameter; PM<sub>2.5-10</sub>, PM > 2.5 and < 10  $\mu\text{m}$  in diameter; WHI, Women's Health Initiative

<sup>a</sup>Model adjusted for race/ethnicity, age, gender (in ARIC), randomly assigned treatment group (in WHI), mean temperature, mean dew point, mean barometric pressure, and season

<sup>b</sup>Homogeneity of associations among strata was tested using Cochran's Q test statistic, where a  $P_{\text{Cochran's } Q} < 0.10$  suggests there is evidence to reject the null hypothesis of homogeneity

**Table S6.** Pooled difference in estimated leukocyte proportion ( $\Delta$ , %) per 10  $\mu\text{g}/\text{m}^3$  increase in PM concentrations among n=8,457 participants, Women's Health Initiative (1993-2002) and Atherosclerosis Risk in Communities study (1990-1995)

|                                                                  | CD8+ T cells                        |                                              | CD4+ T cells                        |                                              | Natural Killer cells                |                                              | B cells                             |                                              | Monocytes                           |                                              | Granulocytes                        |                                              |
|------------------------------------------------------------------|-------------------------------------|----------------------------------------------|-------------------------------------|----------------------------------------------|-------------------------------------|----------------------------------------------|-------------------------------------|----------------------------------------------|-------------------------------------|----------------------------------------------|-------------------------------------|----------------------------------------------|
|                                                                  | $\Delta$ %<br>(95% CI) <sup>a</sup> | <i>P</i> <sub>Cochran's Q</sub> <sup>b</sup> | $\Delta$ %<br>(95% CI) <sup>a</sup> | <i>P</i> <sub>Cochran's Q</sub> <sup>b</sup> | $\Delta$ %<br>(95% CI) <sup>a</sup> | <i>P</i> <sub>Cochran's Q</sub> <sup>b</sup> | $\Delta$ %<br>(95% CI) <sup>a</sup> | <i>P</i> <sub>Cochran's Q</sub> <sup>b</sup> | $\Delta$ %<br>(95% CI) <sup>a</sup> | <i>P</i> <sub>Cochran's Q</sub> <sup>b</sup> | $\Delta$ %<br>(95% CI) <sup>a</sup> | <i>P</i> <sub>Cochran's Q</sub> <sup>b</sup> |
| <b>PM<sub>10</sub> (<math>\mu\text{g}/\text{m}^3</math>)</b>     |                                     |                                              |                                     |                                              |                                     |                                              |                                     |                                              |                                     |                                              |                                     |                                              |
| 2-day mean                                                       | 0.1<br>(-0.3, 0.6)                  | 0.14                                         | -0.1<br>(-0.4, 0.3)                 | 0.04                                         | 0.0<br>(-0.3, 0.3)                  | 0.98                                         | -0.2<br>(-0.4, 0.0)                 | 0.39                                         | 0.0<br>(-0.1, 0.2)                  | 0.45                                         | 0.1<br>(-0.2, 0.3)                  | 0.65                                         |
| 7-day mean                                                       | 0.3<br>(-0.2, 0.8)                  | 0.36                                         | -0.2<br>(-0.5, 0.1)                 | 0.40                                         | -0.1<br>(-0.5, 0.3)                 | 0.36                                         | -0.4<br>(-0.7, -0.1)                | 0.93                                         | -0.1<br>(-0.3, 0.2)                 | 0.51                                         | -0.2<br>(-0.5, 0.1)                 | 0.39                                         |
| 1-month mean                                                     | -0.4<br>(-1.2, 0.4)                 | 0.21                                         | -0.1<br>(-0.7, 0.5)                 | 0.13                                         | -0.3<br>(-0.9, 0.4)                 | 0.26                                         | -0.2<br>(-0.7, 0.3)                 | 0.63                                         | 0.2<br>(-0.4, 0.8)                  | 0.06                                         | 0.4<br>(-0.1, 0.9)                  | 0.32                                         |
| 12-month mean                                                    | -0.4<br>(-1.3, 0.4)                 | 0.68                                         | 0.1<br>(-0.5, 0.7)                  | 0.38                                         | -0.4<br>(-1.6, 0.8)                 | 0.10                                         | -0.4<br>(-1.1, 0.3)                 | 0.62                                         | -0.3<br>(-0.7, 0.2)                 | 0.38                                         | 0.0<br>(-0.9, 0.9)                  | 0.16                                         |
| <b>PM<sub>2.5</sub> (<math>\mu\text{g}/\text{m}^3</math>)</b>    |                                     |                                              |                                     |                                              |                                     |                                              |                                     |                                              |                                     |                                              |                                     |                                              |
| 1-month mean                                                     | -1.1<br>(-1.8, -0.3)                | 0.55                                         | -0.3<br>(-1.2, 0.6)                 | 0.12                                         | -0.5<br>(-2.0, 1.0)                 | 0.01                                         | -0.5<br>(-1.1, 0.1)                 | 0.73                                         | 0.0<br>(-0.5, 0.4)                  | 0.39                                         | 1.2<br>(0.6, 1.8)                   | 0.76                                         |
| 12-month mean                                                    | -1.2<br>(-2.3, 0.0)                 | 0.86                                         | 0.3<br>(-0.5, 1.1)                  | 0.40                                         | -1.6<br>(-3.9, 0.7)                 | 0.03                                         | -0.9<br>(-1.9, 0.1)                 | 0.41                                         | -0.4<br>(-0.9, 0.2)                 | 0.63                                         | 1.1<br>(-0.1, 2.4)                  | 0.29                                         |
| <b>PM<sub>2.5-10</sub> (<math>\mu\text{g}/\text{m}^3</math>)</b> |                                     |                                              |                                     |                                              |                                     |                                              |                                     |                                              |                                     |                                              |                                     |                                              |
| 1-month mean                                                     | 0.4<br>(-0.9, 1.8)                  | 0.19                                         | 0.1<br>(-0.5, 0.6)                  | 0.66                                         | -0.1<br>(-0.9, 0.7)                 | 0.85                                         | -0.1<br>(-0.8, 0.6)                 | 0.78                                         | 0.1<br>(-0.7, 0.8)                  | 0.15                                         | -0.6<br>(-1.2, -0.1)                | 0.41                                         |
| 12-month mean                                                    | 0.1<br>(-2.0, 2.2)                  | 0.20                                         | -0.1<br>(-0.9, 0.7)                 | 0.42                                         | 0.1<br>(-1.0, 1.2)                  | 0.79                                         | -0.3<br>(-1.3, 0.8)                 | 0.71                                         | -0.2<br>(-0.9, 0.4)                 | 0.57                                         | -1.2<br>(-2.4, 0.0)                 | 0.18                                         |

Abbreviations: ARIC, Atherosclerosis Risk in Communities; CI, confidence intervals; PM, particulate matter; PM<sub>10</sub>, PM < 10  $\mu\text{m}$  in diameter; PM<sub>2.5</sub>, PM < 2.5  $\mu\text{m}$  in diameter; PM<sub>2.5-10</sub>, PM > 2.5 and < 10  $\mu\text{m}$  in diameter; WHI, Women's Health Initiative

<sup>a</sup>Model adjusted for race/ethnicity, age, gender (in ARIC), randomly assigned treatment group (in WHI), mean temperature, mean dew point, mean barometric pressure, season, individual-level education and neighborhood socioeconomic status

<sup>b</sup>Homogeneity of associations among strata was tested using Cochran's Q test statistic, where a *P*<sub>Cochran's Q</sub> < 0.10 suggests there is evidence to reject the null hypothesis of homogeneity



**Table S7.** Pooled difference in measured leukocyte proportion ( $\Delta$ , %) per 10  $\mu\text{g}/\text{m}^3$  increase in  $\text{PM}_{2.5}$  concentrations among n=8,646 participants, Atherosclerosis Risk in Communities study (1986-1992)

|                                                | Lymphocytes           | Monocytes             | Granulocytes          |
|------------------------------------------------|-----------------------|-----------------------|-----------------------|
|                                                | $\Delta$ %            | $\Delta$ %            | $\Delta$ %            |
|                                                | (95% CI) <sup>a</sup> | (95% CI) <sup>a</sup> | (95% CI) <sup>a</sup> |
| $\text{PM}_{2.5}$ ( $\mu\text{g}/\text{m}^3$ ) |                       |                       |                       |
| 1-month mean                                   | 0.8<br>(-0.0, 1.6)    | -1.7<br>(-2.5, -0.8)  | 0.9<br>(0.1, 1.6)     |
| 12-month mean                                  | -3.5<br>(-5.4, -1.6)  | 3.1<br>(0.9, 5.3)     | 0.4<br>(-1.3, 2.2)    |

Abbreviations: ARIC, Atherosclerosis Risk in Communities; CI, confidence intervals; PM, particulate matter;  $\text{PM}_{10}$ ,  $\text{PM} < 10 \mu\text{m}$  in diameter

<sup>a</sup>Model adjusted for race/ethnicity, age, gender (in ARIC), randomly assigned treatment group (in WHI), mean temperature, mean dew point, mean barometric pressure, season, individual-level education, neighborhood socioeconomic status, smoking status, alcohol use, body mass index, and physical activity

**Table S8.** Pooled difference in CD4:CD8 ratio ( $\Delta$ , %) per 10  $\mu\text{g}/\text{m}^3$  increase in PM concentrations among  $n=8,457$  participants, Women's Health Initiative (1993-2002) and Atherosclerosis Risk in Communities study (1990-1995)

|                                                                  | CD4:CD8 ratio                       |                                        |
|------------------------------------------------------------------|-------------------------------------|----------------------------------------|
|                                                                  | $\Delta$ %<br>(95% CI) <sup>a</sup> | $P_{\text{Cochran's } Q}$ <sup>b</sup> |
| <b>PM<sub>10</sub> (<math>\mu\text{g}/\text{m}^3</math>)</b>     |                                     |                                        |
| 2-day mean                                                       | -0.3<br>(-0.7, 0.1)                 | 0.03                                   |
| 7-day mean                                                       | -0.5<br>(-1.0, 0.0)                 | 0.43                                   |
| 1-month mean                                                     | 0.2<br>(-0.5, 1.0)                  | 0.80                                   |
| 12-month mean                                                    | 0.3<br>(-0.8, 1.3)                  | 0.66                                   |
| <b>PM<sub>2.5</sub> (<math>\mu\text{g}/\text{m}^3</math>)</b>    |                                     |                                        |
| 1-month mean                                                     | 0.9<br>(-0.1, 2.0)                  | 0.15                                   |
| 12-month mean                                                    | 1.3<br>(-0.2, 2.8)                  | 0.72                                   |
| <b>PM<sub>2.5-10</sub> (<math>\mu\text{g}/\text{m}^3</math>)</b> |                                     |                                        |
| 1-month mean                                                     | -0.6<br>(-1.8, -0.6)                | 0.69                                   |
| 12-month mean                                                    | -0.9<br>(-2.5, 0.8)                 | 0.13                                   |

Abbreviations: ARIC, Atherosclerosis Risk in Communities; CI, confidence intervals; PM, particulate matter; PM<sub>10</sub>, PM < 10  $\mu\text{m}$  in diameter; PM<sub>2.5</sub>, PM < 2.5  $\mu\text{m}$  in diameter; PM<sub>2.5-10</sub>, PM > 2.5 and < 10  $\mu\text{m}$  in diameter; WHI, Women's Health Initiative

<sup>a</sup>Model adjusted for race/ethnicity, age, gender (in ARIC), randomly assigned treatment group (in WHI), mean temperature, mean dew point, mean barometric pressure, season, individual-level education, neighborhood socioeconomic status, smoking status, alcohol use, body mass index, and physical activity

<sup>b</sup>Homogeneity of associations among strata was tested using Cochran's Q test statistic, where a  $P_{\text{Cochran's } Q} < 0.10$  suggests there is evidence to reject the null hypothesis of homogeneity

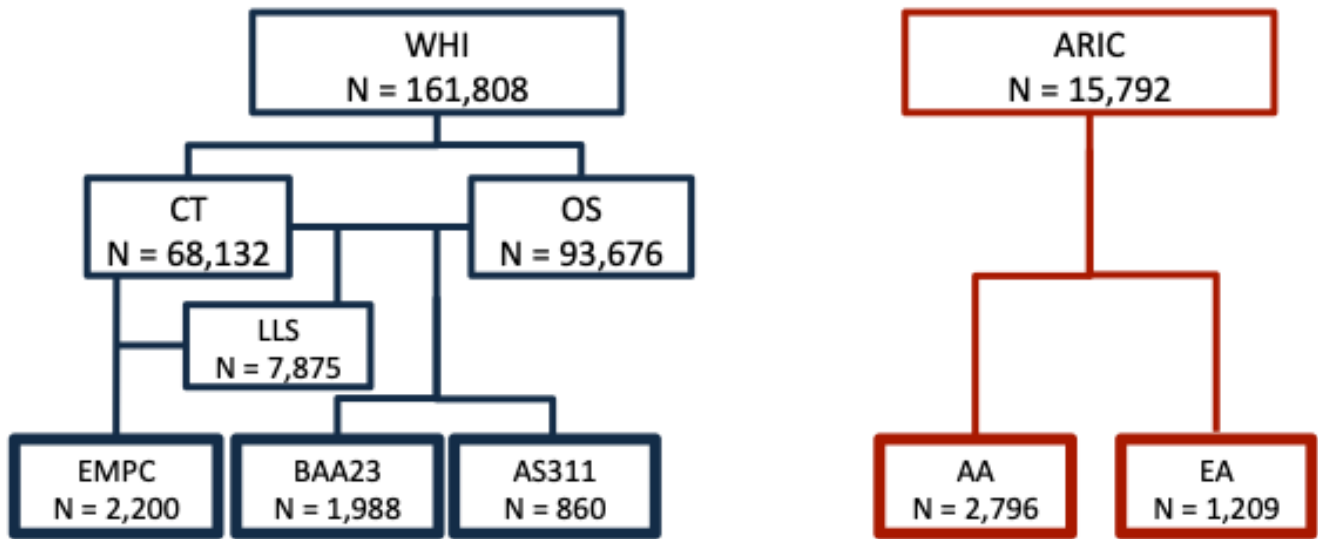

**Figure S1.** Diagram of Women's Health Initiative (1993-2002) and Atherosclerosis Risk in Communities study (1986-1998) populations and subpopulations with leukocyte composition data.

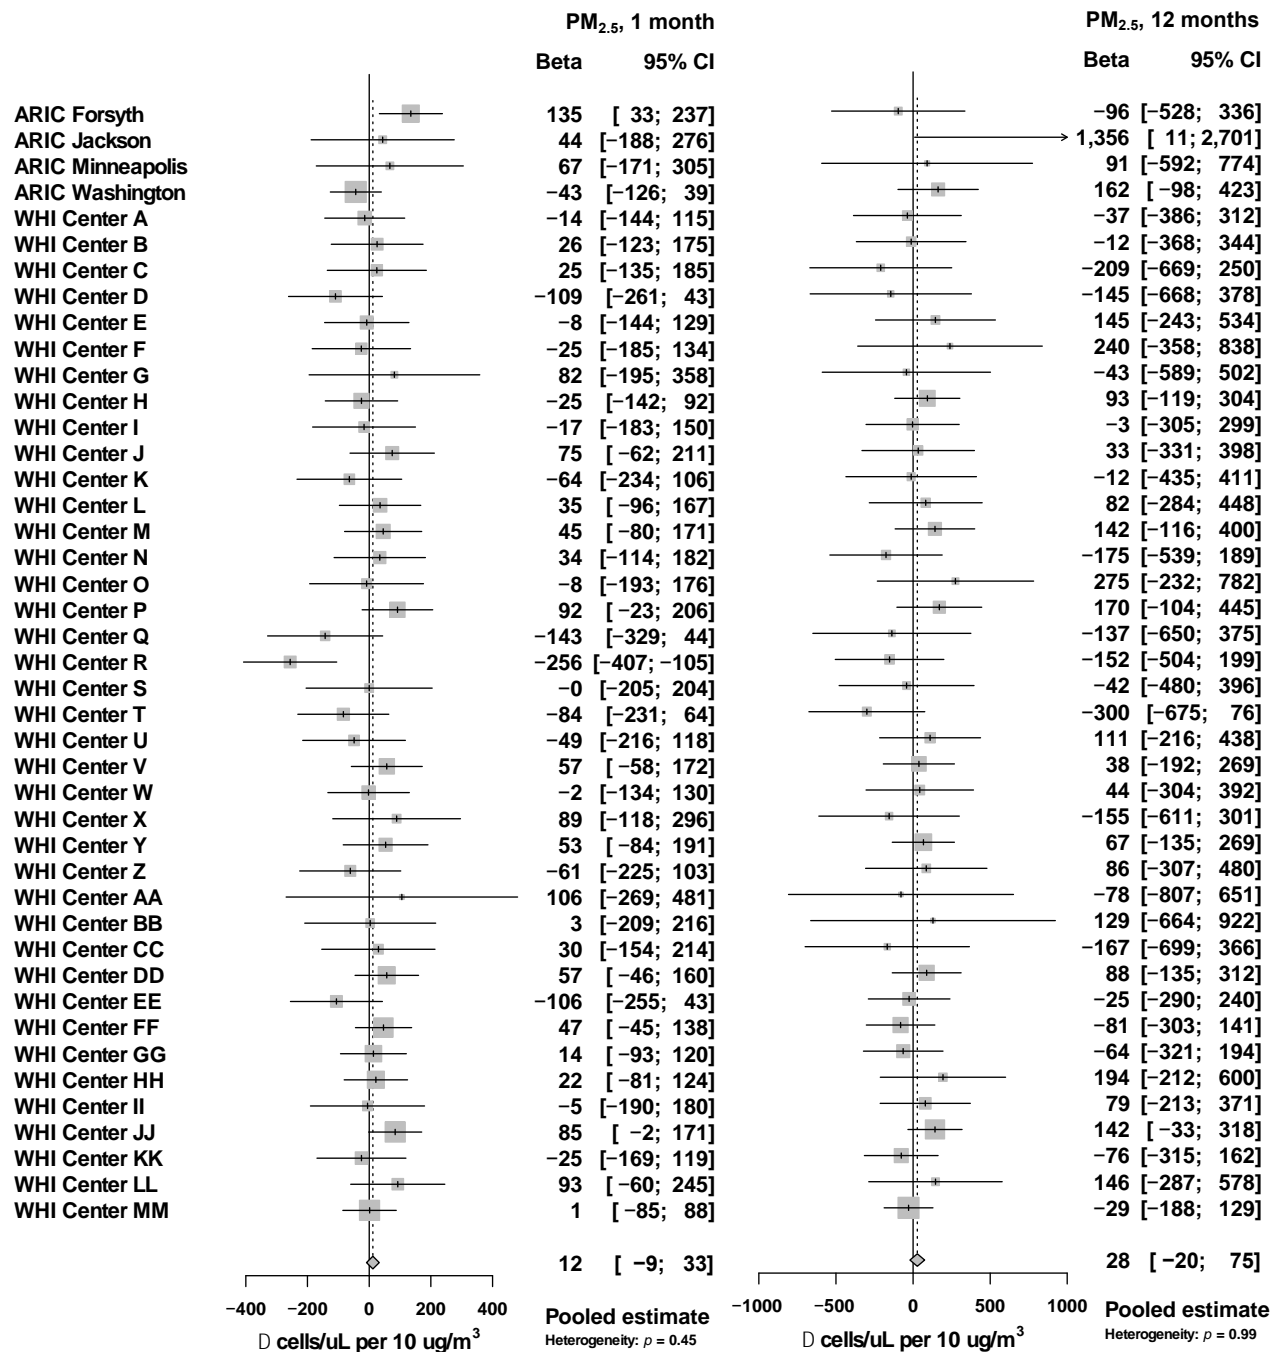

**Figure S2.** Study/center-specific and pooled differences in leukocyte count ( $\Delta$ , cell/ $\mu$ L) per 10  $\mu$ g/ $m^3$  increase in 1- and 12-month mean concentrations of PM<sub>2.5</sub> among n=165,675 participants, Women's Health Initiative (1993-2002) and Atherosclerosis Risk in Communities study (1986-1998). The models adjusted for race/ethnicity, age, sex (in ARIC), randomly assigned treatment group (in WHI), mean temperature, mean dew point, mean barometric pressure, season, and a restricted cubic natural spline function of calendar date with one knot per year, individual-level education, neighborhood socioeconomic status, smoking status, alcohol use, body mass index, and physical activity.

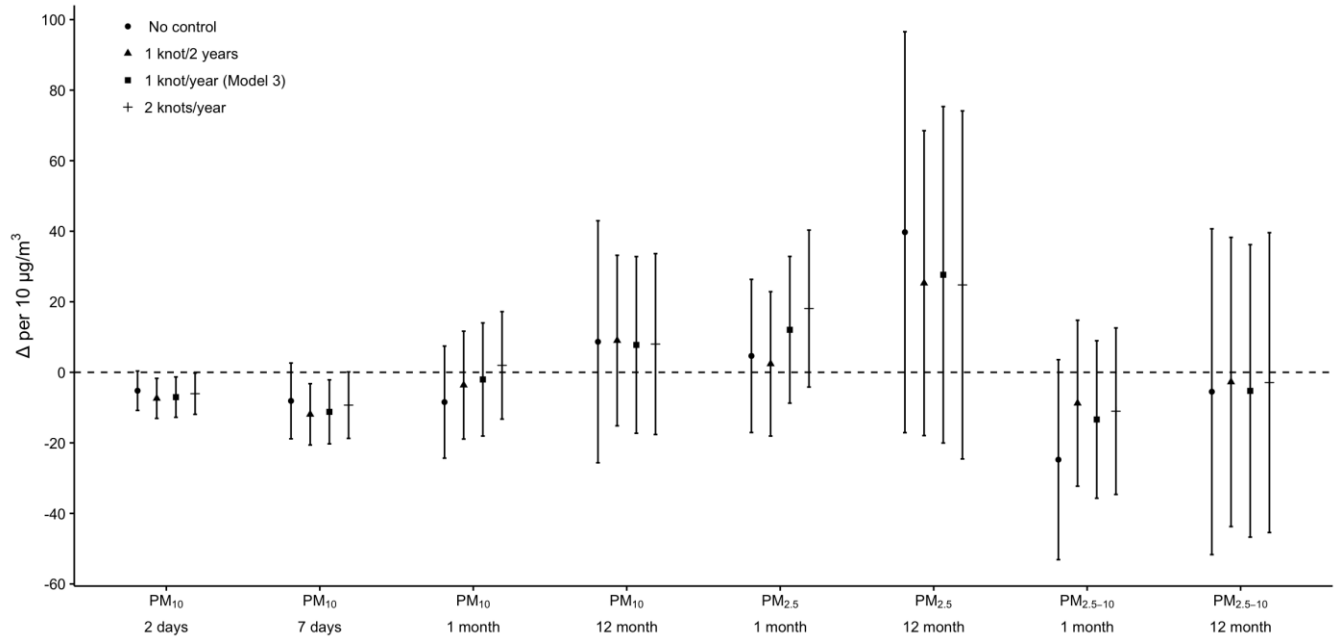

**Figure S3.** Pooled difference in leukocyte count ( $\Delta$ , cell/ $\mu\text{L}$ ) per  $10 \mu\text{g}/\text{m}^3$  increase in PM among  $n=165,675$  participants, Women's Health Initiative (1993-2002) and Atherosclerosis Risk in Communities study (1986-1998). The models adjusted for race/ethnicity, age, sex (in ARIC), randomly assigned treatment group (in WHI), mean temperature, mean dew point, mean barometric pressure, season, individual-level education, neighborhood socioeconomic status, smoking status, alcohol use, body mass index, and physical activity ( $\bullet$ ), with additional adjustment for a restricted cubic natural spline function of calendar date with 1 knot for every 2 years ( $\blacktriangledown$ ), 1 knot per year ( $\blacksquare$ ), and 2 knots per year (+).

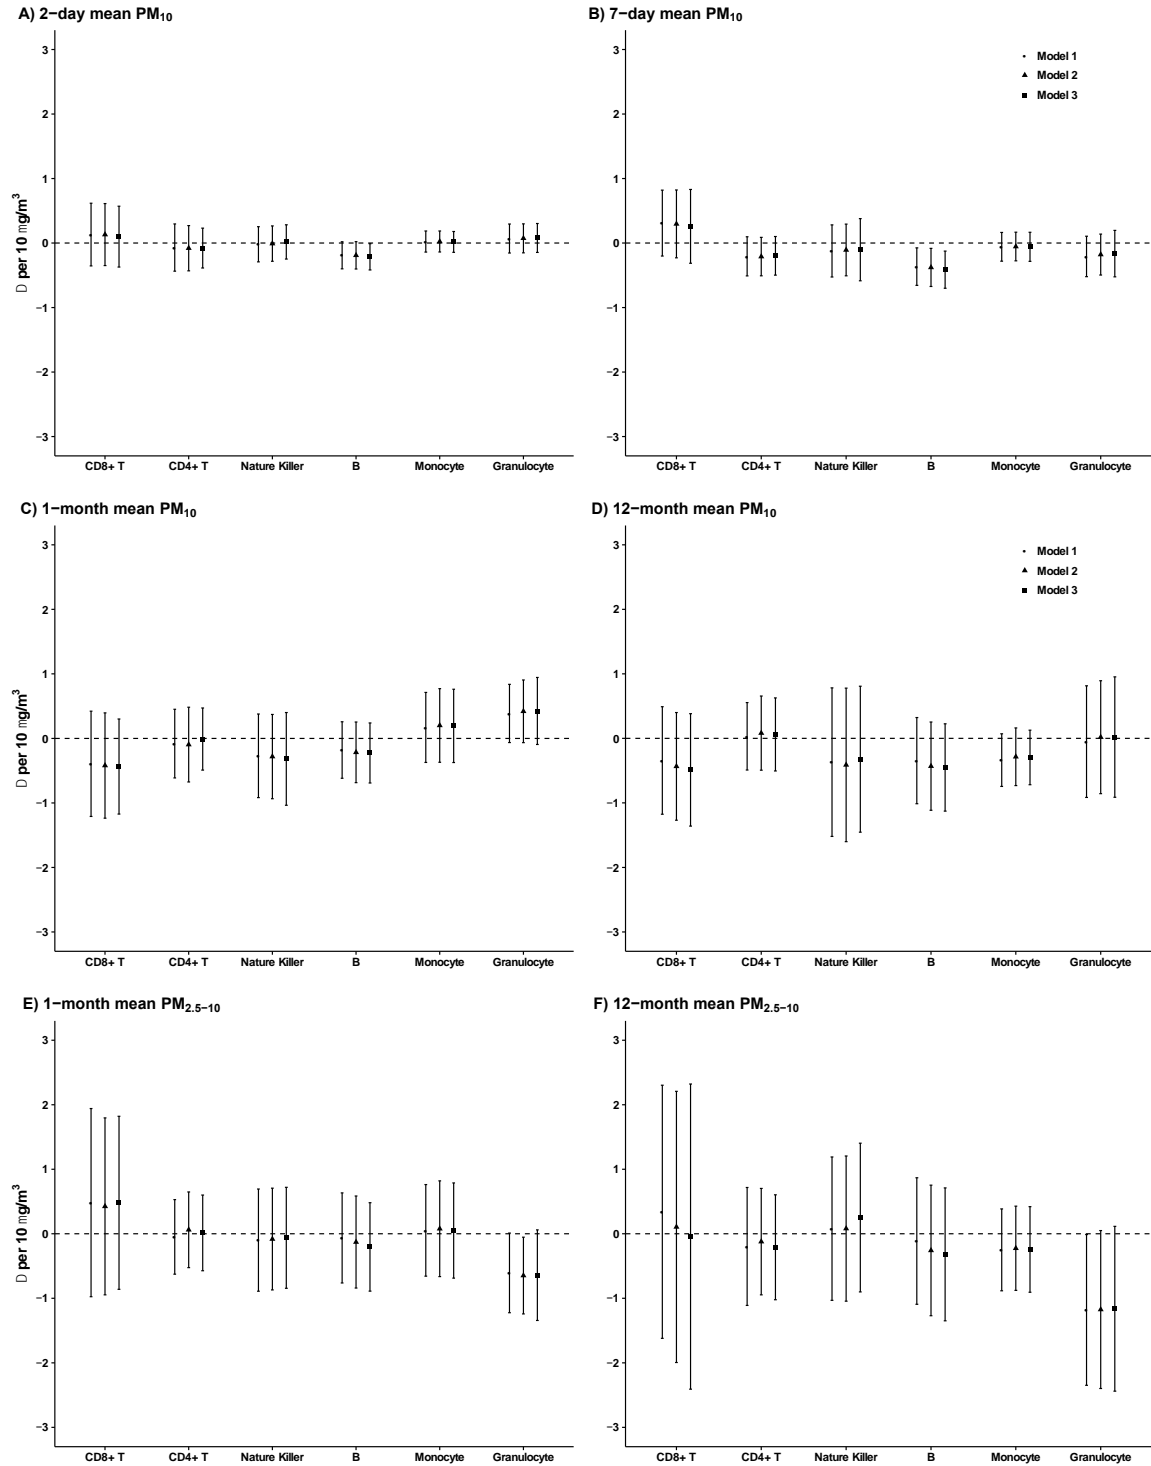

**Figure S4.** Pooled difference in leukocyte composition ( $\Delta$ , % point) per  $10 \mu\text{g}/\text{m}^3$  increase in A) 2- and B) 7-day mean  $\text{PM}_{10}$ ; C) 1- and D) 12-month mean  $\text{PM}_{10}$ ; and E) 1- and F) 12-month mean  $\text{PM}_{2.5-10}$  concentrations among  $n=8,457$  participants, Women's Health Initiative (1993-2002) and Atherosclerosis Risk in Communities study (1990-1995). Model 1 adjusted for race/ethnicity, age, sex (in ARIC), randomly assigned treatment group (in WHI), mean temperature, mean dew point, mean barometric pressure, season, and subpopulation-specific covariates. Model 2 also adjusted for individual-level education and neighborhood socioeconomic status. Model 3 additionally adjusted for smoking status, alcohol use, body mass index, and physical activity.
